# Supplementary material for: Enhancement of multiferroic properties and unusual magnetic phase transition in Eu doped bismuth ferrite nanoparticles
Source: Royal Society of Chemistry journal article supplement (doi:10.1039/c7nj02769a), 2017-01-01
Supplement: c7nj02769a1.pdf [file c7nj02769a1.pdf]

**TABLE 1. Reitveld parameters of different samples.**

| Sample                          | Eu 0       | Eu 1       | Eu 5       | Eu 10      |            |
|---------------------------------|------------|------------|------------|------------|------------|
| a (Å)= b (Å)                    | 5.571 (9)  | 5.560 (9)  | 5.555 (8)  | 5.547 (9)  |            |
| c (Å)                           | 13.854 (5) | 13.843 (4) | 13.828 (2) | 13.799 (1) |            |
| Cell Volume (Å <sup>3</sup> )   | 372.36 (6) | 371.72 (8) | 370.81 (5) | 365.29 (1) |            |
| Particle Size (nm)              | 32.6 (5)   | 29.8 (3)   | 28.6 (3)   | 25.8 (2)   |            |
| Micro Strain x 10 <sup>-3</sup> | 1.32 (2)   | 2.11 (4)   | 3.54 (3)   | 5.65 (1)   |            |
| $\chi^2$                        | 1.19       | 1.10       | 1.15       | 1.05       |            |
| <b>Bond lengths (Å)</b>         |            |            |            |            |            |
| Fe-O                            | 1.921      | 1.920      | 1.917      | 1.914      |            |
| Bi-O                            | 2.360      | 2.359      | 2.348      | 2.336      |            |
| <b>Bond Angles (°)</b>          |            |            |            |            |            |
| Fe-O-Fe                         | 156.22     | 155.45     | 153.97     | 152.27     |            |
| Bi-O-Bi                         | 109.74     | 109.43     | 107.32     | 105.95     |            |
| <b>Atomic Position</b>          |            |            |            |            |            |
| x                               | Bi/Eu      | 0          | 0          | 0          | 0          |
|                                 | Fe         | 0          | 0          | 0          | 0          |
|                                 | O          | 0.4425 (5) | 0.4423 (5) | 0.4420 (4) | 0.4417 (2) |
| y                               | Bi/Eu      | 0          | 0          | 0          | 0          |
|                                 | Fe         | 0          | 0          | 0          | 0          |
|                                 | O          | 0.0145 (2) | 0.0143 (9) | 0.0141 (5) | 0.0136 (5) |
| z                               | Bi/Eu      | 0          | 0          | 0          | 0          |
|                                 | Fe         | 0.2220 (8) | 0.2217 (2) | 0.2215 (8) | 0.2211 (7) |
|                                 | O          | 0.9542 (6) | 0.9540 (4) | 0.9537 (8) | 0.9535 (3) |
| R <sub>wp</sub>                 | 18.6       | 18.3       | 17.7       | 16.9       |            |
| R <sub>p</sub>                  | 4.5        | 4.1        | 3.3        | 2.5        |            |
| R <sub>Bragg</sub>              | 5.2        | 4.8        | 4.1        | 3.4        |            |

**Table 2. Activation energy of different samples:**

| Sample | $E_a$ (eV) |
|--------|------------|
| Eu 0   | 1.08       |
| Eu 1   | 1.12       |
| Eu 5   | 1.18       |
| Eu 10  | 1.24       |

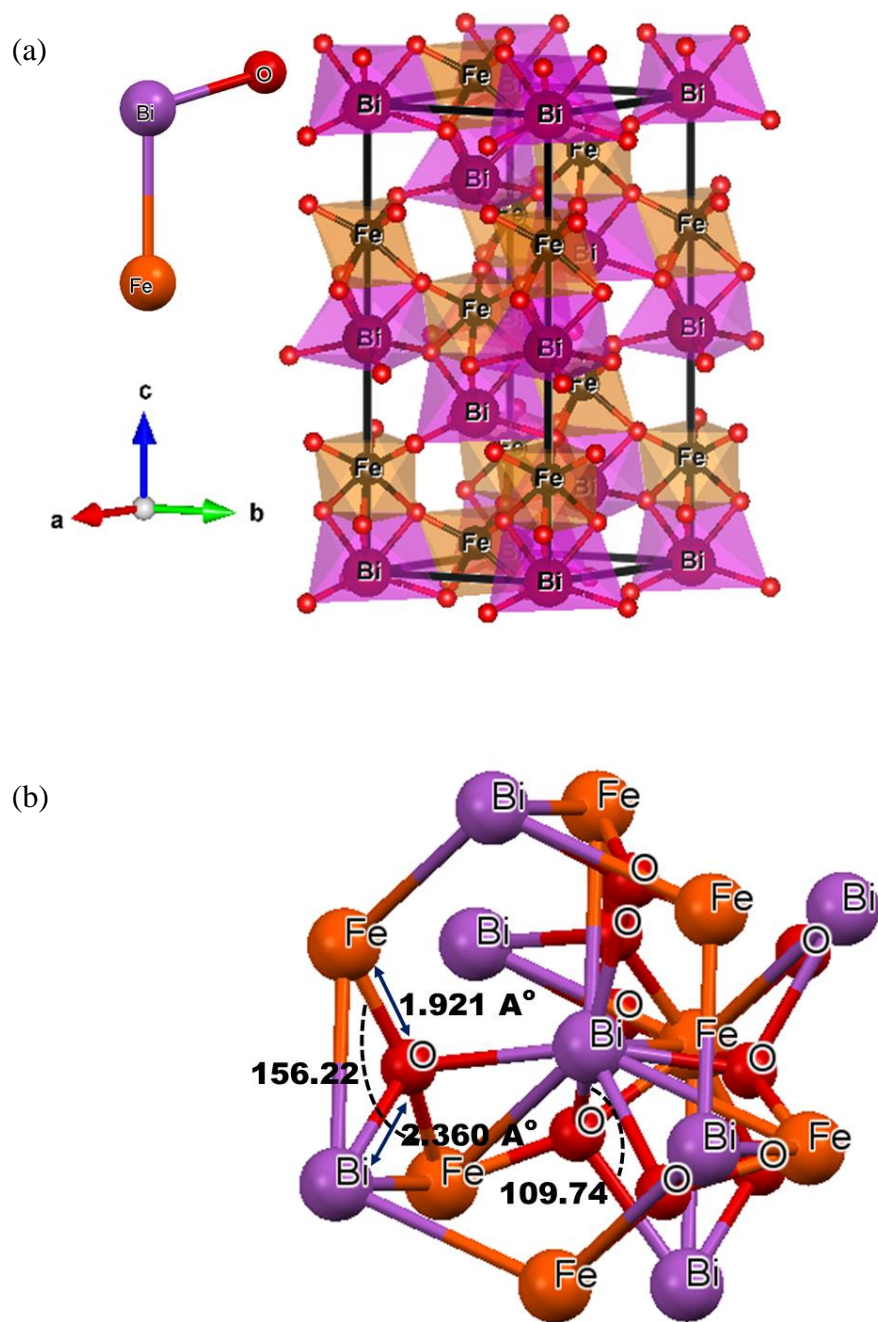

Fig. S1 (a) Crystal structure of Eu 0 representing the  $\text{FeO}_6$  polyhedra (b) unit cell showing the bond position

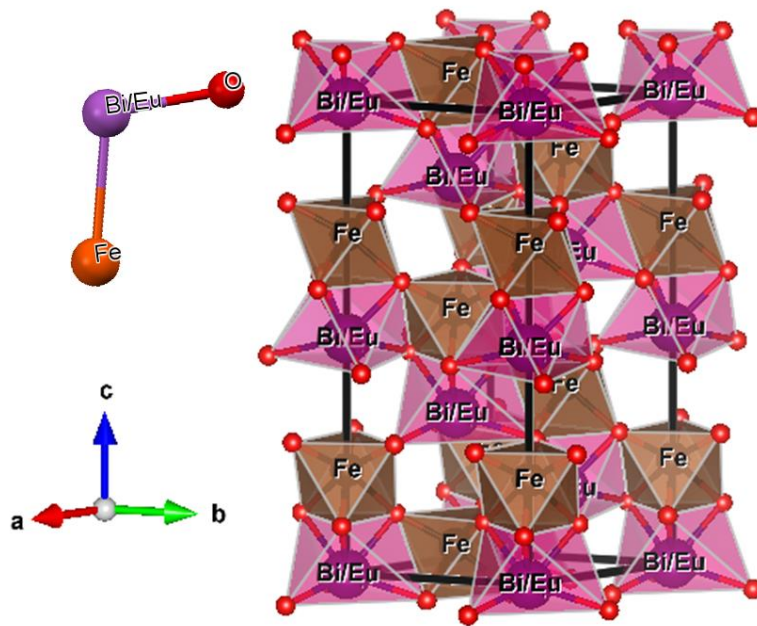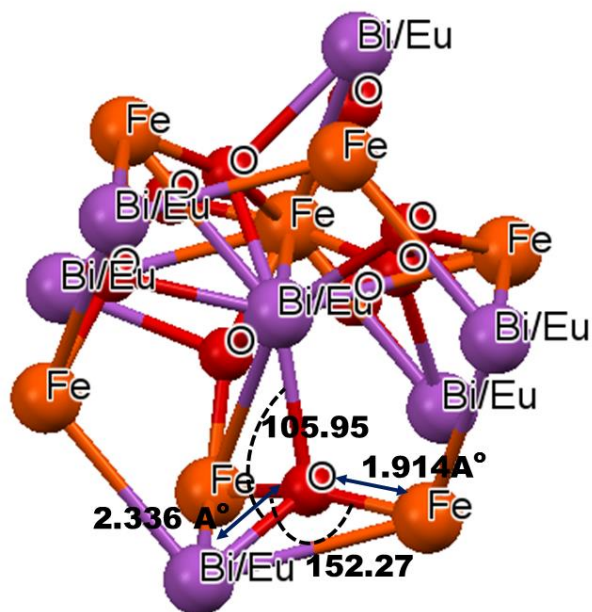

Fig. S2 (a) Crystal structure of Eu<sub>10</sub> representing the FeO<sub>6</sub> polyhedra (b) unit cell showing the corresponding bond position
